# Supplementary material
Source: HighWire-hosted journal article supplement (https://jnm.snmjournals.org/highwire/filestream/94041/field_highwire_adjunct_files/0/63974_Supplemental_Figure_1.pdf)
Supplement: 63974_Supplemental_Figure_1.pdf [file 63974_Supplemental_Figure_1.pdf]

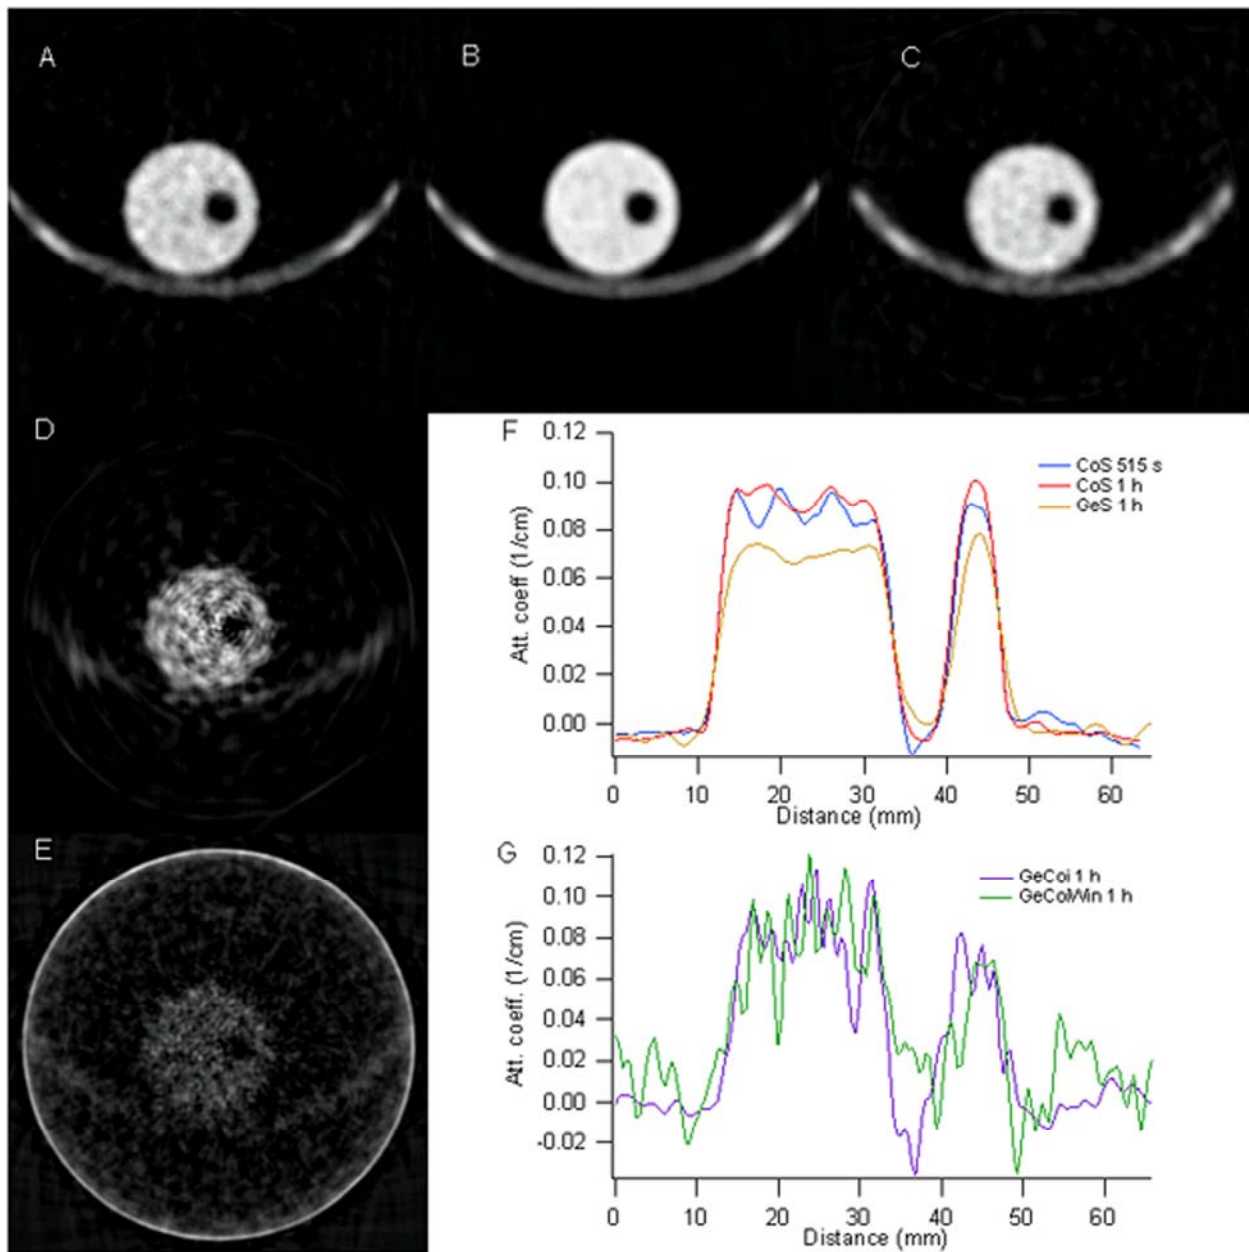

**SUPPLEMENTAL FIGURE 1.** Examples of the transmission FBP reconstructed images for the different transmission modes. (linear gray scale, min = 0, Max = Maximum of image volume). (A) CoS of 515 s, (B) CoS of 1 hour, (C) GeS of 1 hour, (D) GeCoi of 1 hour, (E) GeCoiWin of 1 hour, (F) and (G) Profiles across the non-emitting compartments.
